# Supplementary material
Source: PubMed Central journal article supplement (PMC7377810)
Supplement: mmc1.pdf [file mmc1.pdf]

## Supplementary appendix 1

This appendix formed part of the original submission and has been peer reviewed. We post it as supplied by the authors.

Supplement to: Espinel Z, Chaskel R, Berg RC, et al. Venezuelan migrants in Colombia: COVID-19 and mental health. *Lancet Psychiatry* 2020; **7**: 653–55.

This translation in Spanish was submitted by the authors and we reproduce it as supplied. It has not been peer reviewed. *The Lancet's* editorial processes have only been applied to the original in English, which should serve as reference for this manuscript.

Los autores nos proporcionaron esta traducción al español y la reproducimos tal como nos fue entregada. No la hemos revisado. Los procesos editoriales de *The Lancet* se han aplicado únicamente al original en inglés, que debe servir de referencia para este manuscrito.

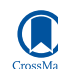

## Migrantes venezolanos en Colombia: COVID-19 y salud mental

Los migrantes venezolanos en Colombia están enfrentándose a un gran número de estresores psicológicos derivados de la situación política, la pobreza, el desplazamiento, la explotación y la pandemia del COVID-19. Más de 5 millones de personas han abandonado Venezuela desde el año 2015. El subgrupo más grande, más de 1.8 millones de personas, continúan desplazándose hacia Colombia, a menudo caminando a pie y dispersándose por todo el país. Dos millones de venezolanos migran pendularmente hacia Colombia en busca de comida, ropa, medicamentos, atención médica y educación.

La salud mental de los migrantes venezolanos se afecta por las adversidades que sufrieron en Venezuela, el éxodo resultante y la incertidumbre que rodea la pandemia del COVID-19. La exposición a trauma, los eventos que transforman la vida y las pérdidas en todas las fases de la migración son factores de riesgo que contribuyen a que los migrantes sean más susceptibles a desarrollar trastornos psiquiátricos.<sup>3-5</sup> Presentaremos los factores de riesgo a los que se enfrentan en el proceso de migración.<sup>7</sup>

Primero, el ímpetu para la migración masiva de venezolanos es el colapso de las instituciones democráticas y el consiguiente deterioro de los servicios públicos en Venezuela. Ante una hiperinflación desestabilizadora, el 94% de los venezolanos vive en la pobreza y aproximadamente el 30% no puede poner suficientes alimentos sobre la mesa para cumplir con los requisitos mínimos de nutrición.<sup>6</sup> El sistema de salud venezolano ha perdido la mitad de sus médicos debido a la migración, hay un 85% de escasez de medicamentos, y hay hospitales que carecen de servicios de agua y electricidad. A menudo, a las personas que padecen de trastornos mentales graves y crónicos solo se les puede brindar atención en el hogar. Los medicamentos antipsicóticos son escasos en Venezuela. La automedicación con antidepresivos y ansiolíticos que son traídos de otros países es frecuente. La tasa de suicidios en Venezuela ocupa el segundo lugar en el hemisferio occidental después de Guyana.<sup>7</sup>

En segundo lugar, la partida de un individuo de su país de origen implica una pérdida profunda.<sup>3,4</sup> Muchos

migrantes nunca regresarán. La pérdida del hogar y de todos los recursos tangibles se intensifica por las enormes pérdidas sociales. Los migrantes dejan atrás a familiares, amigos y mascotas. También pierden su identidad nacional, su sustento y su estatus en la comunidad.

Tercero, el desplazamiento de los migrantes está lleno de peligros. El Alto Comisionado de las Naciones Unidas para los Refugiados llevo a cabo 8000 entrevistas de monitoreo de protección con migrantes venezolanos en diversos lugares de Suramérica y encontró que la mitad (50.2%) de las familias corrían el riesgo de sufrir lesiones (ya sea por otras personas o mientras estaban en tránsito) o recurrían a comportamientos riesgosos de supervivencia.<sup>8</sup> La victimización y la explotación son comunes en las regiones fronterizas. Grupos al margen de la ley y grupos de atracadores reclutan jóvenes y adultos jóvenes venezolanos (de 13 a 25 años). Los actores armados obligan a los migrantes indocumentados a trabajar en los campos de coca o en las minas ilegales de oro, y las mujeres venezolanas se han visto obligadas a realizar trabajo sexual.

Cuarto, al llegar a su destino final en Colombia, muchos migrantes venezolanos no tienen un estatus oficial en el país. Si bien Colombia ha otorgado de manera generosa permisos especiales a más del 60% de los migrantes venezolanos, estas personas luchan por conseguir empleo, a menudo compitiendo con los colombianos, entre ellos, con los desplazados internos (PDI), para ganarse la vida en la economía informal.<sup>5</sup> Al igual que los 5.5 millones de desplazados internos de Colombia, los venezolanos que viven en Colombia corren el riesgo de sufrir depresión mayor, ansiedad generalizada, trastorno de estrés posttraumático (TEPT), y trastornos por consumo de sustancias.<sup>3-5</sup> Un estudio que evaluó la depresión, la ansiedad generalizada, y el trastorno de estrés posttraumático en mujeres colombianas desplazadas en Bogotá encontró que 63.4% de estas mujeres tenían sintomatología que sugería la presencia de al menos una de estas condiciones.<sup>4</sup> Un estudio de migrantes venezolanos en Bogotá mostró que el 21% tenía un posible TEPT.<sup>9</sup>

Quinto, la pandemia del COVID-19, que no tiene precedente, es el último hecho en una serie de eventos que le ha cambiado la vida a los migrantes venezolanos y que los predisponen a psicopatología.<sup>1,3,4</sup> Los migrantes tienen un mayor riesgo de contagiarse con el COVID-19 porque están expuestos a mayores densidades de población, deficiencias en saneamiento, y a la dificultad de no poder distanciarse socialmente o lavarse las manos de manera efectiva. Las medidas preventivas de aislamiento generan dificultades desproporcionadas para los migrantes. De acuerdo con una evaluación rápida, el 84% de los hogares con migrantes venezolanos carece de alimentos suficientes para las tres comidas del día y el trabajo remunerado como fuente principal de ingresos se ha desplomado del 91% al 20% durante el aislamiento en los hogares.<sup>10</sup>

Sexto, miles de refugiados venezolanos que sin éxito buscaron trabajo en otras naciones sudamericanas, que ahora tienen altas tasas de COVID-19, están migrando a su país nuevamente a través de Colombia. Es posible que algunos de estos migrantes traigan consigo el virus. Seguramente están alimentando la creciente xenofobia alimentada por COVID-19.<sup>1</sup>

¿Cómo pueden abordarse las necesidades de salud mental de los migrantes venezolanos en Colombia?

Las estrategias de campo para la salud mental y el apoyo psicosocial (MHPSS) que han sido revisadas se están evaluando para la situación actual. Las medidas de salud pública para mitigar la propagación del COVID-19 deben priorizarse para los migrantes. Las prioridades incluyen el suministro de alimentos, el apoyo para el pago del alquiler y las oportunidades de empleo cuando se relajen las medidas de mitigación. Los municipios colombianos han establecido una línea directa para brindar apoyo en salud mental y conectar a las personas con los servicios.

Alrededor del 10% (180 000) de los migrantes venezolanos tienen seguro de salud colombiano, lo cual permite hasta diez sesiones con psicología y la posibilidad de remisión a psiquiatría. La forma más directa para garantizar el acceso a servicios de salud mental de calidad es acelerar la inscripción de migrantes en el sistema nacional de salud. También hay múltiples organizaciones intergubernamentales y no gubernamentales activas en Colombia que

brindan apoyo psicosocial. El Comité Permanente entre Organismos (IASC) utiliza una pirámide de intervenciones en cuatro niveles para organizar y coordinar diversos servicios para la población, que van desde el establecimiento de medidas de seguridad y necesidades básicas hasta los servicios más especializados como la psicoterapia individual o la de grupo administrada por psiquiatras. IASC ha adaptado su modelo para el COVID-19.

Se necesita coordinación entre los organismos de respuesta para lograr una cobertura integral. Los enfoques probados incluyen: búsqueda activa, tamizaje de los trastornos de la salud más comunes utilizando instrumentos de evaluación validados y la aplicación de un modelo de atención escalonada para remitir a las personas que presenten con síntomas serios a intervenciones basadas en la evidencia, aprobadas por la OMS y proporcionadas por consejeros que han sido capacitados y son supervisados. Dada la escasez de profesionales de la salud mental en países de medianos y bajos ingresos, la cobertura de salud mental puede ampliarse mediante la capacitación de trabajadores comunitarios para que lleven a cabo las intervenciones (el llamado *task shifting* o intercambio de tareas). Deben tomarse medidas para que se puedan remitir migrantes que presenten ideación suicida o síntomas severos a una evaluación psiquiátrica de emergencia. Las sesiones de intervención deben continuar hasta que los síntomas disminuyan a niveles sub-sindrómicos.

Para los venezolanos que recuerdan a su país antes de la década del 2000, la transformación de una democracia funcional y solvente a una autocracia, disfuncional y en bancarota ha sido psicológicamente desconcertante y agobiante. Los millones de venezolanos que tomaron la decisión de migrar se enfrentan a un sinnúmero de estresores y ahora, sumado a la pandemia de COVID-19, se aumenta el riesgo de mayores problemas de salud mental. Proporcionar ayuda psicosocial (MHPSS) para los migrantes venezolanos en Colombia constituye un enorme desafío y una necesidad imperiosa.

No tenemos conflictos de interés.

*Zelde Espinel, Roberto Chaskel, Ryan C Berg, Hermes Jose Florez, Silvia L Gaviria, Oscar Bernal, Kim Berg, Carlos Muñoz, Marisa G Larkin, James M Shultz*
