# Supplementary material
Source: PubMed Central journal article supplement (PMC7377810)
Supplement: mmc2.pdf [file mmc2.pdf]

## Supplementary appendix 2

This appendix formed part of the original submission and has been peer reviewed. We post it as supplied by the authors.

Supplement to: Espinel Z, Chaskel R, Berg RC, et al. Venezuelan migrants in Colombia: COVID-19 and mental health. *Lancet Psychiatry* 2020; **7**: 653–55.

|                                                                                                                                                                                                                                                                                                                                                                                                                                                                                                                                                                                                                                                                                                                                                                                                                                                                                                                                                                                                                                                                                                                                                                                                                                                                                                                                                                                                                                                                                                                                                                                                                                                                                                                                                                                                |                                                                                                                                                                                                                                                                                                                                                                                                                                                                                                                                                                                                                                                                                                                                                                                                                                                                                                                                                                                                                                                                                                                                                                                                                                                                                                                                                                                                                                                                 |
|------------------------------------------------------------------------------------------------------------------------------------------------------------------------------------------------------------------------------------------------------------------------------------------------------------------------------------------------------------------------------------------------------------------------------------------------------------------------------------------------------------------------------------------------------------------------------------------------------------------------------------------------------------------------------------------------------------------------------------------------------------------------------------------------------------------------------------------------------------------------------------------------------------------------------------------------------------------------------------------------------------------------------------------------------------------------------------------------------------------------------------------------------------------------------------------------------------------------------------------------------------------------------------------------------------------------------------------------------------------------------------------------------------------------------------------------------------------------------------------------------------------------------------------------------------------------------------------------------------------------------------------------------------------------------------------------------------------------------------------------------------------------------------------------|-----------------------------------------------------------------------------------------------------------------------------------------------------------------------------------------------------------------------------------------------------------------------------------------------------------------------------------------------------------------------------------------------------------------------------------------------------------------------------------------------------------------------------------------------------------------------------------------------------------------------------------------------------------------------------------------------------------------------------------------------------------------------------------------------------------------------------------------------------------------------------------------------------------------------------------------------------------------------------------------------------------------------------------------------------------------------------------------------------------------------------------------------------------------------------------------------------------------------------------------------------------------------------------------------------------------------------------------------------------------------------------------------------------------------------------------------------------------|
| <p><b>Venezuelan migrants in Colombia: Exposure to hazards, losses, and life changes throughout phases of migration</b></p>                                                                                                                                                                                                                                                                                                                                                                                                                                                                                                                                                                                                                                                                                                                                                                                                                                                                                                                                                                                                                                                                                                                                                                                                                                                                                                                                                                                                                                                                                                                                                                                                                                                                    | <p><b>Mental health and psychosocial support interventions following IASC guidelines and using WHO-sanctioned interventions</b></p>                                                                                                                                                                                                                                                                                                                                                                                                                                                                                                                                                                                                                                                                                                                                                                                                                                                                                                                                                                                                                                                                                                                                                                                                                                                                                                                             |
| <p><b>Migration stressors</b></p> <p><b>1) Pre-migration:</b><br/> Collapse of democratic institutions<br/> Poverty<br/> Hunger and malnutrition<br/> Deterioration of health care systems<br/> Lack of mental health care/medications</p> <p><b>2) Departure:</b><br/> Loss of home and tangible resources<br/> Loss of family/community/social ties<br/> Loss of status, identity, occupational roles</p> <p><b>3) Migration journey:</b><br/> Physical exhaustion, hunger, and fatigue<br/> Danger of victimization and exploitation</p> <p><b>4) Settlement in Colombia:</b><br/> Poverty<br/> Homelessness<br/> Lack of official status<br/> Lack of access to healthcare<br/> Danger of victimization and exploitation<br/> Employment in informal sector<br/> Possible need to engage in survival behaviors<br/> Stigma, stigmatization, xenophobia</p> <p><b>Overlay of COVID-19 risks</b></p> <p><b>5) COVID-19 infection risks</b><br/> Severe disease risks for older persons<br/> Risks for those with underlying medical conditions<br/> Malnutrition from living in Venezuela<br/> Immune suppression from living in Venezuela<br/> High population density in informal settlements<br/> Inability to socially distance<br/> Lack of access to water, sinks, soaps, cleansers<br/> Livelihood imperative to work in public settings<br/> Reliance on public transportation</p> <p><b>6) COVID-19 mitigation hardships</b><br/> Lack of food<br/> Lack of paid work during lockdown<br/> Lack of rent monies<br/> Lack of health care access</p> <p><b>Elevated rates of common mental disorders</b><br/> (major depression, generalized anxiety, PTSD, substance use disorders)</p> <p>Elevated rates predating COVID-19<br/> Potentially higher rates during/after COVID-19</p> | <p><b>1) Prioritize migrants for public health measures to mitigate the spread of COVID-19</b><br/> Food<br/> Rent support<br/> Access to testing, health care if symptomatic</p> <p><b>2) Connect migrants to available crisis hotlines and networks of mental health services</b></p> <p><b>3) Regularize migrants / enroll them in national health insurance programs to allow access to mental health consults</b></p> <p><b>4) Involvement of intergovernmental and non-governmental organizations</b><br/> Apply Inter Agency Standing Committee (IASC) guidelines<br/> Adapt IASC principles to COVID-19<br/> Coordinate services using Mental Health and Psychosocial Support (MHPSS) intervention pyramid<br/> Adapt MHPSS to complex emergencies: forced migration and COVID-19 pandemic<br/> Use “whole of society” approach</p> <p><b>5) Develop and refine the MHPSS interventions</b><br/> Develop stepped-care models<br/> Outreach to venues where migrants live<br/> Screen for common mental disorders using validated tools<br/> Train para-professionals to deliver interventions<br/> Deliver WHO-vetted, evidence-based interventions<br/> Optimize task shifting/task sharing<br/> Continue intervention sessions until symptom resolution<br/> Adjust intervention to the cultural context<br/> Follow-up, evaluate, refine the intervention<br/> Scale/disseminate promising interventions<br/> Bring MHPSS interventions to scale</p> |
